# Supplementary material for: Persistent fluid flows defined by active matter boundaries
Source: Springer Nature journal article supplement (doi:10.1038/s42005-021-00703-3), 2021-08-27
Supplement: 42005_2021_703_MOESM1_ESM.pdf [file 42005_2021_703_MOESM1_ESM.pdf]

## Description of Additional Supplementary Files

**File Name:** Supplementary Movie 1

**Description:** Video of 600  $\mu\text{m}$  square network from Figure 1.

**File Name:** Supplementary Movie 2

**Description:** Video of 400  $\mu\text{m}$  rectangular network with aspect ratios of .75 from Figure 3

**File Name:** Supplementary Movie 3

**Description:** Video of 400  $\mu\text{m}$  rectangular network with aspect ratios of .5 from Figure 3

**File Name:** Supplementary Movie 4

**Description:** Video of 400  $\mu\text{m}$  rectangular network with aspect ratios of .25 from Figure 3.

**File Name:** Supplementary Movie 5

**Description:** Video of 400  $\mu\text{m}$  rectangular network with aspect ratios of .05 from Figure 3.

**File Name:** Supplementary Movie 6

**Description:** Video of hexagon networks from Figure 4.

**File Name:** Supplementary Movie 7

**Description:** Video of equal angle triangle from Figure 4

**File Name:** Supplementary Movie 8

**Description:** Video of isosceles triangle from Figure 4.
